# Supplementary material
Source: PubMed Central journal article supplement (PMC10068014)
Supplement: mmc1.pdf [file mmc1.pdf]

**OMTN, Volume 32**

**Supplemental information**

**STAT3 silencing by an aptamer-based strategy  
hampers the crosstalk between NSCLC cells  
and cancer-associated fibroblasts**

**Maria L. Ibba, Giuseppe Ciccone, Deborah Rotoli, Gabriele Coppola, Alfonso Fiorelli, Silvia Catuogno, and Carla L. Esposito**

**Supplemental materials:**

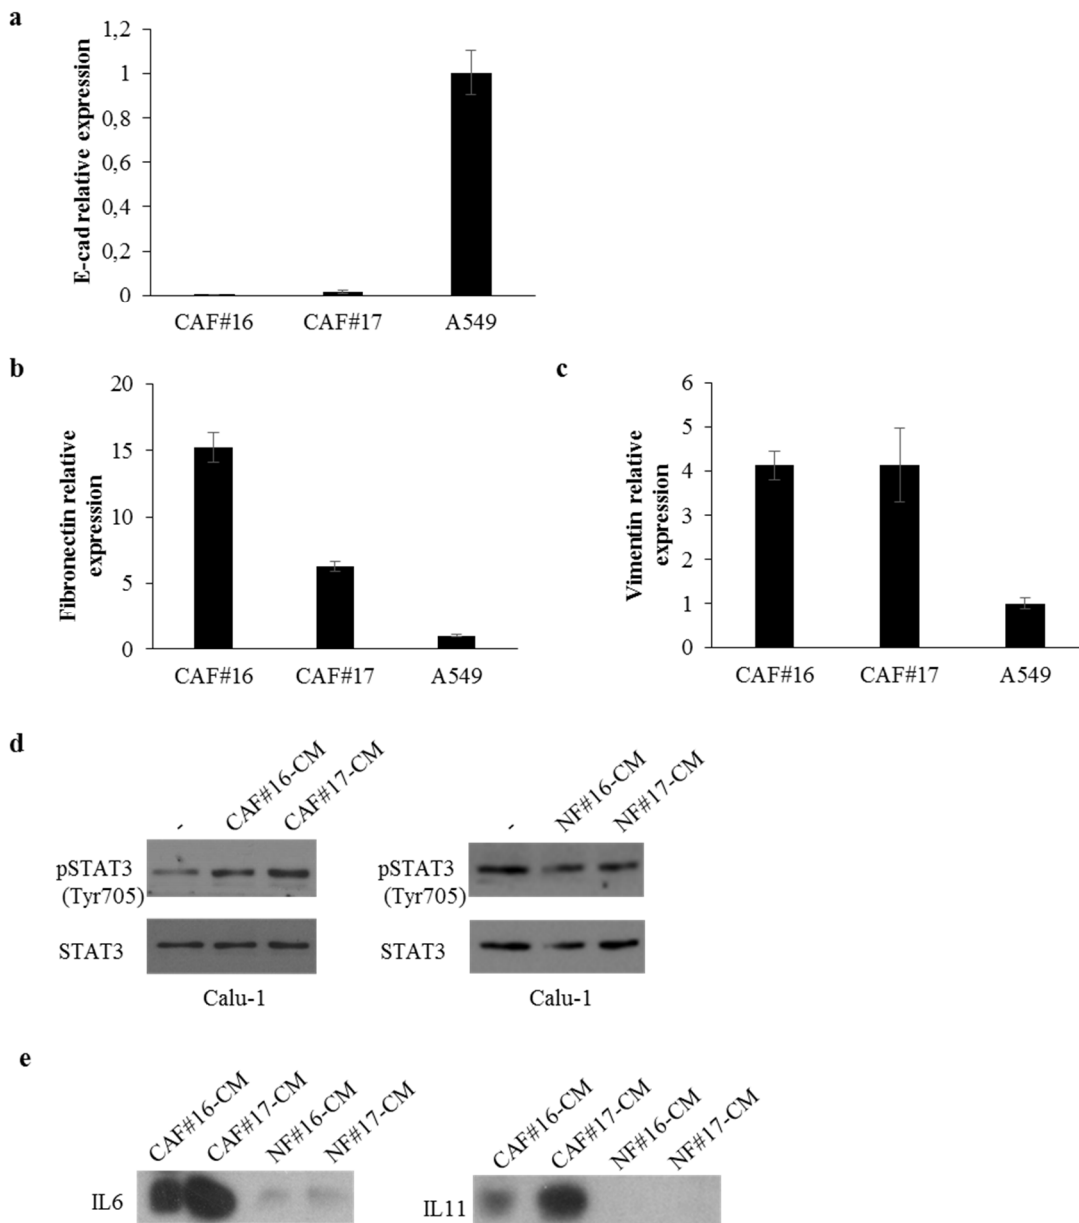

**Figure S1.** (a-c) Levels of E-cad, fibronectin and vimentin were measured by RTqPCR in the indicated cells. (d) Levels of phospho-STAT3 (pSTAT3) and STAT3 were analysed by immunoblot in Calu-1 cells grown in 1% FBS medium (-) or 1% FBS CAF or NF CMs for 72 hours. (e) Immunoblot analyses of IL6 and IL11 levels in CMs derived from indicated CAFs or NFs.

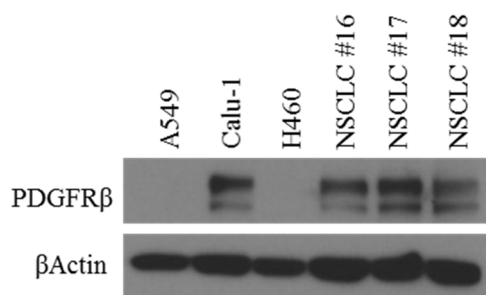

**Figure S2.** PDGFR $\beta$  levels were analyzed by immunoblot in the indicated cell lines.  $\beta$ -Actin antibodies were used as loading control.

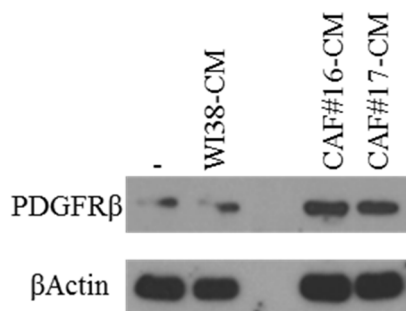

**Figure S3.** PDGFR $\beta$  levels were analyzed by immunoblot in Calu-1 cells grown in 1% FBS medium (-) or 1% CMs from the indicated cell lines.  $\beta$ Actin antibodies were used as loading control.

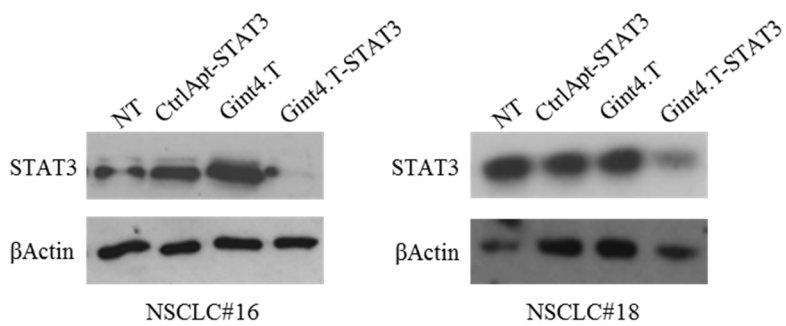

**Figure S4.** STAT3 levels were analyzed by immunoblot in NSCLC#16 and NSCLC#18 primary cells upon Gint4.T. STAT3 treatment (400nmol/L).  $\beta$ Actin antibodies were used as loading control.

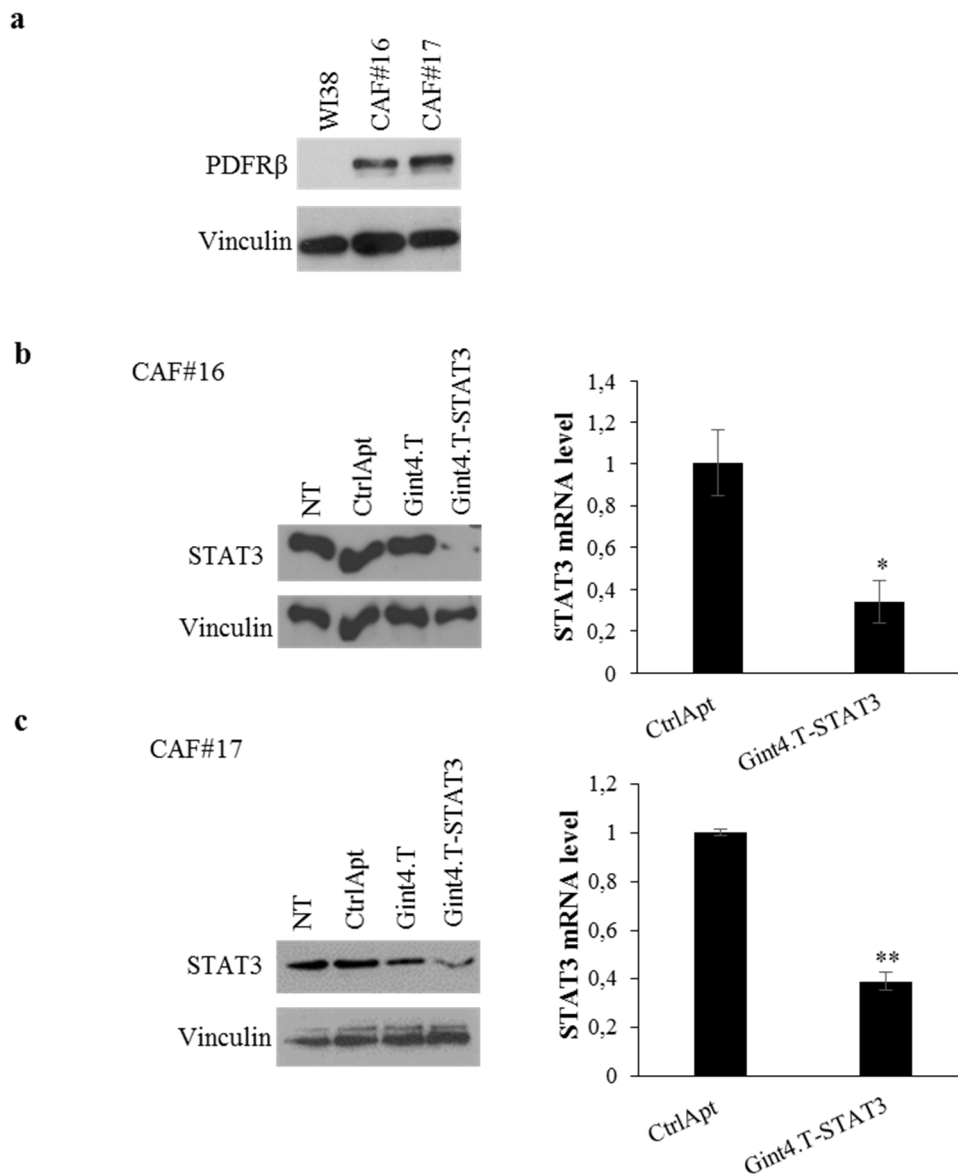

**Figure S5.** (a) PDGFR $\beta$  levels in the indicated cell lines. (b, c) STAT3 levels were analyzed by immunoblot (*left panels*) or RT-qPCR (*right panels*) in CAF#16 and CAF#17 primary cells left untreated or treated with 400 nmol/L CtrlApt, Gint4.T or Gint4.T-STAT3 as indicated. In (a-c) Vinculin antibodies were used as loading control
